# Supplementary material for: The effects of MoO3 impregnation order on the catalytic activity for propane combustion over Pt/ZrO2 catalysts: the crucial roles of Pt–MoO3 interfacial sites density
Source: Royal Society of Chemistry journal article supplement (doi:10.1039/d1nj02764f), 2021-01-01
Supplement: d1nj02764f1.pdf [file d1nj02764f1.pdf]

## Supporting Information

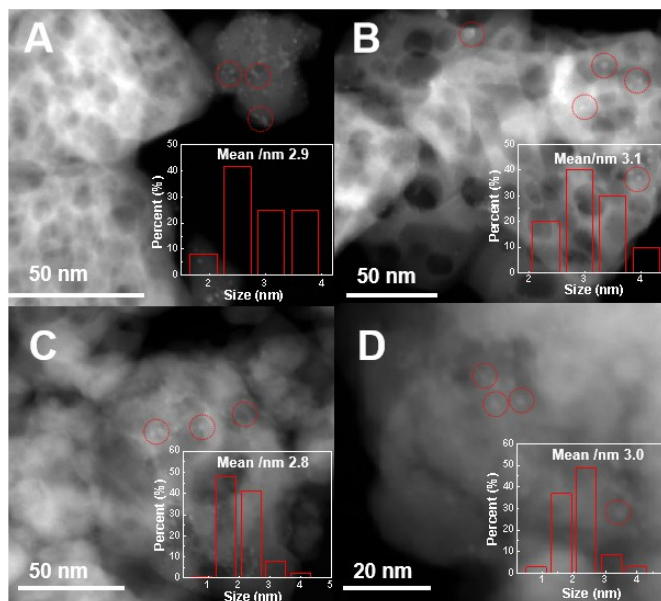

Fig. S1. HAADF-STEM of A) Pt/ZrO<sub>2</sub>, B) Pt-Mo/ZrO<sub>2</sub>, C) Mo/Pt/ZrO<sub>2</sub> and D) Pt/Mo/ZrO<sub>2</sub> catalysts (with particle size distribution of Pt inset).
